# Supplementary material for: Bacillus cytotoxicus Isolated from a Pristine Natural Geothermal Area Reveals High Keratinolytic Activity
Source: PubMed Central journal article supplement (PMC7355561; doi:10.3390/microorganisms8060796), 2020-05-26
Supplement: microorganisms-08-00796-s001.pdf [file microorganisms-08-00796-s001.pdf]

**Supplementary Table 1.** Biochemical characterization of *Bacillus cytotoxicus* strains isolated from Domuyo geothermal area in Neuquén province, Argentina.

| Isolate | Catalase | Cytochrome Oxidase | Glucose | Lactose | H <sub>2</sub> S production | Gas production | Nitrate reduction | Mannitol | Gelatin hydrolysis | Citrate | Methyl Red | Voges-Proskauer | Salt (g.L <sup>-1</sup> ) | Phylogenetic affiliation    | NCBI Acc. Number |
|---------|----------|--------------------|---------|---------|-----------------------------|----------------|-------------------|----------|--------------------|---------|------------|-----------------|---------------------------|-----------------------------|------------------|
| LT-1    | +        | +                  | +       | +       | -                           | -              | +                 | -        | +                  | -       | +          | -               | 25 - 100                  | <i>Bacillus cytotoxicus</i> | KR559937         |
| Oll-15  | +        | +                  | +       | +       | -                           | -              | +                 | -        | +                  | -       | +          | -               | 25 - 100                  | <i>Bacillus cytotoxicus</i> | KR559942         |
| Oll-16  | +        | +                  | +       | +       | -                           | -              | +                 | -        | +                  | -       | +          | -               | 25 - 100                  | <i>Bacillus cytotoxicus</i> | KY559288         |
| Oll-18  | +        | +                  | +       | -       | -                           | -              | +                 | -        | +                  | -       | +          | -               | 25 - 100                  | <i>Bacillus cytotoxicus</i> | KR559943         |
| Oll-30  | +        | +                  | +       | +       | -                           | -              | +                 | -        | +                  | -       | +          | -               | 25 - 100                  | <i>Bacillus cytotoxicus</i> | KR559949         |
| LT-32   | +        | +                  | +       | -       | -                           | -              | +                 | -        | +                  | -       | +          | -               | 25 – 50                   | <i>Bacillus cytotoxicus</i> | KR559950         |
| LT-34   | +        | +                  | +       | -       | -                           | -              | +                 | -        | +                  | -       | +          | -               | 25 - 50                   | <i>Bacillus cytotoxicus</i> | KR559952         |
| LT-35   | +        | +                  | +       | -       | -                           | -              | +                 | -        | +                  | -       | +          | -               | 25 – 75                   | <i>Bacillus cytotoxicus</i> | KR559953         |

**Supplementary Table 2.** Enzymatic activity profile of the isolates. Enzymatic activities were tested at 50°C, + indicates activity at 24 hours (otherwise indicated), - indicates no activity after 5 days. The last column indicates the accession number of each 16S rRNA gene sequence in the NCBI Data base

| Isolate | Enzymatic activity |           |            |          |            |            |            |           | Phylogenetic affiliation    | NCBI Acc. Number |
|---------|--------------------|-----------|------------|----------|------------|------------|------------|-----------|-----------------------------|------------------|
|         | keratinases        | proteases | estearases | amylases | cellulases | inulinases | pectinases | xylanases |                             |                  |
| LT-1    | +                  | +         | -          | -        | -          | -          | +          | -         | <i>Bacillus cytotoxicus</i> | KR559937         |
| Oll-15  | +                  | +         | -          | -        | +          | -          | +          | -         | <i>Bacillus cytotoxicus</i> | KR559942         |
| Oll-16  | +                  | +         | -          | +        | -          | -          | +          | -         | <i>Bacillus cytotoxicus</i> | KY559288         |
| Oll-18  | +                  | +         | -          | -        | -          | -          | -          | -         | <i>Bacillus cytotoxicus</i> | KR559943         |
| Oll-30  | 72 hs              | +         | -          | -        | -          | -          | -          | -         | <i>Bacillus cytotoxicus</i> | KR559949         |
| LT-32   | 72 hs              | +         | -          | -        | -          | -          | -          | -         | <i>Bacillus cytotoxicus</i> | KR559950         |
| LT-34   | +                  | +         | -          | -        | -          | -          | -          | -         | <i>Bacillus cytotoxicus</i> | KR559952         |
| LT-35   | +                  | +         | -          | -        | -          | -          | -          | -         | <i>Bacillus cytotoxicus</i> | KR559953         |
